# Supplementary material
Source: publisher figshare collection journal article supplement (https://tandf.figshare.com/ndownloader/files/17496332)
Supplement: Supplementary file 1 [file 17496332]

**Appendix S1** List coral specimens examined in the study. For each sample, voucher code, morphological identified species, sampling locality, and GenBank accession numbers at each analysed locus are listed

| Voucher code | Species | Locality | Site GPS (degrees) | mtCR | ITS region |
| --- | --- | --- | --- | --- | --- |
| SA0970 | *Porites columnaris* | Aqaba | 28.403N, 34.740E | MK902958 | MK881231  MK881232 |
| SA1032 | *Porites rus* | Aqaba | 28.403N, 34.740E | MK902960 | MK881235 |
| SA0876 | *Porites annae* | Duba | 27.905N, 35.059E | MK902957 | MK881229  MK881230 |
| SA2080 | *Porites columnaris* | Yanbu | 24.101N, 38.009E | MK902981 | MK881265  MK881266 |
| SA2081 | *Porites lutea* | Yanbu | 24.101N, 38.009E | MK902982 | MK881267  MK881268 |
| SA2136 | *Porites solida* | Yanbu | 24.101N, 38.009E | MK902983 | MK881269 |
| SA2153 | *Porites rus* | Yanbu | 24.101N, 38.009E | MK902987 | MK881274  MK881275 |
| SA2156 | *Porites echinulata* | Yanbu | 24.101N, 38.009E | MK902988 | MK881276 |
| SA2165 | *Porites fontanesii* | Yanbu | 24.101N, 38.009E | MK902991 | MK881281  MK881282 |
| SA2194 | *Porites lobata* | Yanbu | 24.101N, 38.009E | MK902992 | MK881283  MK881284 |
| SA0388 | *Porites lutea* | Thuwal | 22.607N, 38.918E | MK902946 | MK881215 |
| SA0390 | *Porites annae* | Thuwal | 22.607N, 38.918E | MK902948 | MK881218  MK881219 |
| SA0438 | *Porites fontanesii* | Thuwal | 22.426N, 38.996E | MK902949 | MK881220  MK881221 |
| SA0054 | *Porites lobata* | Farasan Banks | 19.005N, 40.148E | MK902927 | MK881179  MK881180 |
| SA0091 | *Porites echinulata* | Farasan Banks | 18.659N, 40.826E | MK902930 | MK881184  MK881185 |
| SA0092 | *Porites lobata* | Farasan Banks | 18.659N, 40.826E | MK902931 | MK881186 |
| SA0149 | *Porites solida* | Farasan Banks | 18.220N, 41.3243E | MK902932 | MK881187  MK881188 |
| SA0172 | *Porites farasani* sp. nov. | Farasan Banks | 18.220N, 41.324E | xxx | MK965513 |
| SA0180 | *Porites farasani* sp. nov. | Farasan Banks | 18.220N, 41.324E | xxx | MK965514  MK965515 |
| SA0268 | *Porites lutea* | Farasan Banks | 18.281N, 41.445E | MK902936 | MK881195  MK881196 |
| SA0308 | *Porites monticulosa* | Farasan Banks | 18.281N, 41.445E | MK902938 | MK881199  MK881200 |
| SA0310 | *Porites fontanesii* | Farasan Banks | 18.281N, 41.445E | MK902939 | MK881201  MK881202 |
| SA1516 | *Porites farasani* sp. nov. | Farasan Islands | 17.110N, 42.067E | MK902968 | MK881244 |
| SA1518 | *Porites annae* | Farasan Islands | 17.110N, 42.067E | MK902969 | MK881245 |
| SA1581 | *Porites echinulata* | Farasan Islands | 17.467N, 41.787E | MK902971 | MK881249 |
| SA1609 | *Porites lobata* | Farasan Islands | 17.606N, 41.670E | MK902972 | MK881250  MK881251 |
| SA1704 | *Porites columnaris* | Farasan Islands | 16.872N, 41.440E | MK902978 | MK881261 |
| SA1705 | *Porites solida* | Farasan Islands | 16.872N, 41.440E | MK902979 | MK881262  MK881263 |
| BU070 | *Porites hadhramauti* sp. nov | Burum, Yemen | 14.307N, 48.967E | xxx | MK965510 |
| BA025 | *Porites annae* | Bir Ali, Yemen | 13.986N, 48.318E | xxx | MK965515 |
|  |  |  |  |  |  |
| P11 | *Porites solida* | Balhaf, Yemen | 13.972N, 48.175E | xxx | MK965511 |
| P9 | *Porites columnaris* | Balhaf, Yemen | 13.972N, 48.175E | xxx | MK965512 |
|  |  |  |  |  |  |
| BA109 | *Porites rus* | Bir Ali, Yemen | 13.935N, 48.387E | xxx | MK965508 |
|  |  |  |  |  |  |
| BA098 | *Porites lutea* | Bir Ali, Yemen | 13.929N, 48.386E | xxx | MK965509 |
|  |  |  |  |  |  |
| AD007 | *Porites echinulata* | Aden,  Yemen | 12.751N, 45.027E | xxx | MK965507 |
| SO009 | *Porites fontanesii* | Socotra Island, Yemen | 12.582N, 54.433E | xxx | MK965515 |
|  |  |  |  |  |  |
